# Supplementary material
Source: PubMed Central journal article supplement (PMC3678258)
Supplement: NIHMS454501-supplement-Suppl_Data_2.pdf [file NIHMS454501-supplement-Suppl_Data_2.pdf]

Suppl Table 1. Seed heptamers from the analyzed 4 RNAi libraries.

1; Silencer Select, 2; MSK, 3; Druggable Genome, 4; TRC 1.0, ND; Not defined.

\*Only 100 targets shown.

| Seed Heptamer | RNAi Library | # of miRNAs | Family  | miRbase ID   | miRNA sequence            |      | Validated targets                                                   |
|---------------|--------------|-------------|---------|--------------|---------------------------|------|---------------------------------------------------------------------|
| AAAGTAA       | 3, 4         | 12          | mir-559 | MIMAT0003223 | TAAAGTAAATATGCACCAAAA     | (4)  | ERBB2, VCL, MTA1, MTA2                                              |
|               |              |             | mir-548 | MIMAT0004798 | AAAAGTAA TTGTGGTTTTGGCC   |      | Unk                                                                 |
|               |              |             | mir-548 | MIMAT0004803 | AAAAGTAA TTGCGAGTTTTACC   |      | Unk                                                                 |
|               |              |             | mir-548 | MIMAT0004806 | AAAAGTAA TTGCGGTTTTTGCC   |      | Unk                                                                 |
|               |              |             | mir-548 | MIMAT0004812 | AAAAGTAA TTGTGGTTTTTGCC   |      | Unk                                                                 |
|               |              |             | mir-548 | MIMAT0005875 | AAAAGTAA TTGCGGTCTTTGGT   |      | Unk                                                                 |
|               |              |             | mir-548 | MIMAT0005928 | AAAAGTAA TCGCGGTTTTTGTC   |      | Unk                                                                 |
|               |              |             | mir-548 | MIMAT0005935 | AAAAGTAA TTGCGGATTTTGCC   |      | Unk                                                                 |
|               |              |             | mir-548 | MIMAT0015060 | AAAAGTAA CTGCGGTTTTTGCCCT |      | Unk                                                                 |
|               |              |             | mir-548 | MIMAT0018354 | AAAAGTAA TCACTGTTTTTGCC   |      | Unk                                                                 |
|               |              |             | mir-548 | MIMAT0018928 | AAAAGTAA TTGTGGATTTTGCT   |      | Unk                                                                 |
|               |              |             | mir-548 | MIMAT0019013 | AAAAGTAA CTGCGGTTTTTGA    |      | Unk                                                                 |
| AAGTGCT       | 1, 2, 4      | 12          | mir-302 | MIMAT0000684 | TAAGTGCTTCCATGTTTTGGTGA   | (6)  | TAC1, CDK4, CCND1, LEFTY1, CDKN1A, LEFTY2                           |
|               |              |             | mir-302 | MIMAT0000715 | TAAGTGCTTCCATGTTTTAGTAG   | (3)  | BMI1, CCND2, TP63                                                   |
|               |              |             | mir-302 | MIMAT0000717 | TAAGTGCTTCCATGTTTCAGTGG   | (2)  | ESR1, CCND1                                                         |
|               |              |             | mir-302 | MIMAT0000718 | TAAGTGCTTCCATGTTTGAGTGT   | (10) | TRPS1, KLF13, MBNL2, EGFA, CDK2, CCND2, NR4A2, EFTY1, LEFTY2, ERBB4 |

|           |              |                         |         |                                                                                                                                                                                                                                                                                                                                                                                                                                                                                                                                                                                                                                                                                                                                                       |                        |  |     |
|-----------|--------------|-------------------------|---------|-------------------------------------------------------------------------------------------------------------------------------------------------------------------------------------------------------------------------------------------------------------------------------------------------------------------------------------------------------------------------------------------------------------------------------------------------------------------------------------------------------------------------------------------------------------------------------------------------------------------------------------------------------------------------------------------------------------------------------------------------------|------------------------|--|-----|
| mir-290   | MIMAT0000724 | AAAGTGCTGCGACATTTGAGCGT |         | LATS2, CDKN1A, VEGFA, KLF13, MBNL2, TRPS1, NR4A2, ERBB4                                                                                                                                                                                                                                                                                                                                                                                                                                                                                                                                                                                                                                                                                               |                        |  |     |
| mir-373   | MIMAT0000726 | GAAGTGCTTCGATTTTGGGGTGT | (95)    | MARCH4, SEPT2, ADAM9, ANKRD13B, AOF1, ARHGEF3, BAZ1A, C11orf15, C12orf23, C13orf27, C20orf142, C2orf18, C5orf5, C9orf78, CD24, CD24P4, CD44, CD83, CDK11, CDK19, CENPF, CFL2, CKLFSF4, CMTM4, CNOT6, CSDC2, CYB5R4, EG1, FAM13B, FLJ25555, FLJ34236, FYCO1, GBAS, GBP3, GLTP, GPM2, HERPUD1, HSPA14, INSIG2, KIAA1194, KIAA1399, KIAA1919, KIF23, KLHL12, LATS2, LMNB1, LOC149420, LOC51035, LOC93081, LUC7L2, MGC17943, MGC29898, MICA, MKRN1, MRE11A, MYBL1, NCB5OR, NEDD5, NIN, NUPL1, PACRGL, PBK, PCGF5, PDIK1L, PHC2, PRC1, RABEP1, RAD23B, RAD52, RECK, RELA, RNF149, RNF159, RPIA, SLC25A23, STK4, STX11, TBC1D2, TFAP4, TMEM14A, TMEM9B, TNFAIP1, TOPK, TTC8, TUSC2, TXNIP, UBXN1, USP12, VEGFA, VPS26, VPS26A, XM_034274, XPA, ZHX1, ZNF226 |                        |  |     |
| mir-515   | MIMAT0002825 | AAAGTGCTTCCTTTTTGAGGG   | (1)     | CD46                                                                                                                                                                                                                                                                                                                                                                                                                                                                                                                                                                                                                                                                                                                                                  |                        |  |     |
| mir-515   | MIMAT0002834 | AAAGTGCTTCCCTTTGGACTGT  | (1)     | CDKN1A                                                                                                                                                                                                                                                                                                                                                                                                                                                                                                                                                                                                                                                                                                                                                |                        |  |     |
| mir-515   | MIMAT0002843 | AAAGTGCTTCCTTTTAGAGGG   | (3)     | CD46, CDKN1A, MICA                                                                                                                                                                                                                                                                                                                                                                                                                                                                                                                                                                                                                                                                                                                                    |                        |  |     |
| mir-515   | MIMAT0002846 | AAAGTGCTTCCTTTTAGAGGGT  | (2)     | APP, CD44                                                                                                                                                                                                                                                                                                                                                                                                                                                                                                                                                                                                                                                                                                                                             |                        |  |     |
| mir-515   | MIMAT0002856 | AAAGTGCTTCTCTTTGGTGGGT  |         | Unk                                                                                                                                                                                                                                                                                                                                                                                                                                                                                                                                                                                                                                                                                                                                                   |                        |  |     |
| mir-302_2 | MIMAT0005931 | TAAGTGCTTCCATGCTT       |         | Unk                                                                                                                                                                                                                                                                                                                                                                                                                                                                                                                                                                                                                                                                                                                                                   |                        |  |     |
| TCTAGAG   | 1, 2, 3, 4   | 10                      | mir-515 | MIMAT0002831                                                                                                                                                                                                                                                                                                                                                                                                                                                                                                                                                                                                                                                                                                                                          | CTCTAGAGGGAAGCGCTTTCTG |  | Unk |

|         |              |                        |     |
|---------|--------------|------------------------|-----|
| mir-515 | MIMAT0005454 | CTCTAGAGGGAAGCGCTTTCTG | Unk |
| mir-515 | MIMAT0005449 | CTCTAGAGGGAAGCGCTTTCTG | Unk |
| mir-515 | MIMAT0002841 | CTCTAGAGGGAAGCACTTTCTC | Unk |
| mir-515 | MIMAT0002845 | CTCTAGAGGGAAGCACTTTCTG | Unk |
| mir-515 | MIMAT0005455 | CTCTAGAGGGAAGCACTTTCTG | Unk |
| mir-515 | MIMAT0005450 | CTCTAGAGGGAAGCGCTTTCTG | Unk |
| mir-515 | MIMAT0005456 | CTCTAGAGGGAAGCACTTTCTG | Unk |
| mir-515 | MIMAT0005451 | CTCTAGAGGGAAGCGCTTTCTG | Unk |
| mir-515 | MIMAT0005452 | CTCTAGAGGGAAGCGCTTTCTG | Unk |

---

|         |         |    |       |              |                        |      |                                                                                                                                                                                                                                                                                                                                                                                            |
|---------|---------|----|-------|--------------|------------------------|------|--------------------------------------------------------------------------------------------------------------------------------------------------------------------------------------------------------------------------------------------------------------------------------------------------------------------------------------------------------------------------------------------|
| GAGGTAG | 1, 2, 3 | 11 | let-7 | MIMAT0000062 | TGAGGTAGTAGGTTGTATAGTT | (53) | AMMECR1, APP, BCL2, CASP3, CASP8, CASP9, caspase-3, CCND2, CDC25A, CDK6, c-MYC, DICER1, E2F1, E2F2, EGR3, EIF2C4, FOXA1, HMGA1, HMGA2, HNRPDL, HRAS, IGF2, IGF-II, IL6, integrinbeta, ITGB3, KRAS, LIN28A, lin-41, MEIS1, MYC, NEFM, NF2, NFKB1, NIRF, NKIRAS2, NR1I2, NRAS, p27, PRDM1, PRDM1/Blimp-1, RAS, RAVR2, SLC20A1, THBS1, TRIM71, trim71, TUSC2, UHRF2, VDR, WAF1, wech, ZFP36L1 |
|---------|---------|----|-------|--------------|------------------------|------|--------------------------------------------------------------------------------------------------------------------------------------------------------------------------------------------------------------------------------------------------------------------------------------------------------------------------------------------------------------------------------------------|

|       |              |                        |        |                                                                                                                                                                                                                                                                                                                                                                                                                                                                                                                                                                                                                                                                                                                                                                          |
|-------|--------------|------------------------|--------|--------------------------------------------------------------------------------------------------------------------------------------------------------------------------------------------------------------------------------------------------------------------------------------------------------------------------------------------------------------------------------------------------------------------------------------------------------------------------------------------------------------------------------------------------------------------------------------------------------------------------------------------------------------------------------------------------------------------------------------------------------------------------|
| let-7 | MIMAT0000063 | TGAGGTAGTAGGTTGTGTGGTT | (468)* | A2BP1, AARSD1, ABCB10, ABCC1, ACACA, ACPP, ACSL1, ACTG1, AGL, AHCTF1, AKAP8, AKR1A1, ALG3, ANAPC1, ANKZF1, ANP32E, ANXA8, ANXA8L1, ANXA8L2, APRT, ARCN1, ARFIP2, ARHGAP17, ARID3A, ARL15, ASCC3, ATAD3B, ATG4B, ATG9A, ATP2A2, ATP6V0A1, ATP6V1F, AURKA, AURKB, BAG5, BAT2, BAZ1A, BAZ1B, BCL7A, BIRC6, BZW2, C10orf57, C11orf2, C12orf30, C13orf1, C15orf44, C1orf128, C1orf27, C20orf72, C2orf18, C2orf56, C6orf167, C7orf58, C8orf30A, CA12, CALCOCO2, CAPG, CARHSP1, CBF, CCBL2, CCDC115, CCDC134, CCNA1, CCNA2, CCND1, CCND2, CCNF, CCNJ, CCNK, CCNY, CDC25A, CDC34, CDC91L1, CDCA7, CDCA8, CDIPT, CDK6, CDKAL1, CENPB, CENPV, CHAF1A, CHD1, CHD3, CHD4, CHMP2A, CHPF2, CHRAC1, CIAO1, CLPX, CMC1, CNDP2, COIL, COMMD9, COPG, COPS2, COX7B, CPSF1, CPSF3L, CRKL, CS |
| let-7 | MIMAT0000064 | TGAGGTAGTAGGTTGTATGGTT | (7)    | MYC, RIM71, HMGA2, DICER1, TGFBR1, BCL2L1, NRAS                                                                                                                                                                                                                                                                                                                                                                                                                                                                                                                                                                                                                                                                                                                          |

|       |              |                        |      |                                                                                                                                                                                                                                                                                                                                                                                                                                                                                                                                                                                                                                                                                                                         |
|-------|--------------|------------------------|------|-------------------------------------------------------------------------------------------------------------------------------------------------------------------------------------------------------------------------------------------------------------------------------------------------------------------------------------------------------------------------------------------------------------------------------------------------------------------------------------------------------------------------------------------------------------------------------------------------------------------------------------------------------------------------------------------------------------------------|
| let-7 | MIMAT0000065 | AGAGGTAGTAGGTTGCATAGTT | (93) | ABT1, ADCY9, AKAP8, APP, ARID3A, ARRDC4, BCL2, BDNF, BIN3, BUB3, C11orf57, C9orf41, CALCOCO2, CBR4, CDC25A, CDK6, CEP120, CPNE1, D3R, DICER1, DLC1, ERC1, ESPL1, FAM104A, FAM135A, FAM159B, FBXO3, GLMN, GOLT1B, GPR137B, GPR63, HAND1, HMGA2, HOMER1, IGDCC4, IGF1R, IGF2BP1, IGF2BP3, IL-13, ISL1, KATNAL1, KIAA1219, KPNA5, KRAS, LARP5, LBR, LIN28B, LIN52, MEX3A, MLL, NAT5, NHLRC3, NR4A1, ONECUT2, PCGF3, PCNP, PDGFA, POLR2D, RAD9A, RAS, RFX5, RPUSD2, SFRS12, SLC10A7, SLC11A2, SLC20A1, SLC30A6, SMARCAD1, SMCR7L, SPATA2, SPRYD4, STK40, TBC1D9B, TGFBR1, THBS1, TLE4, TMED4, TMEM135, TMEM194A, TMEM2, TMTC3, TNRC6A, TOMM20, TST, USP24, ZBTB24, ZBTB39, ZNF200, ZNF280B, ZNF354B, ZNF526, ZNF644, ZNF763 |
| let-7 | MIMAT0000066 | TGAGGTAGGAGGTTGTATAGTT | (8)  | SMC1A, EIF3S1, YCN , HMGA2,DAD1, RABGAP1L, EIF3J, WNT1                                                                                                                                                                                                                                                                                                                                                                                                                                                                                                                                                                                                                                                                  |
| let-7 | MIMAT0000067 | TGAGGTAGTAGATTGTATAGTT | (16) | BCL2L1, Bmi-1, CDC25A, CDK6, CDKN2A, c-MYC, COL1A2, HMGA2, IGF2BP1, IL-13, IMP-1, INK4A, KRAS, MDR1, MYC, RAS                                                                                                                                                                                                                                                                                                                                                                                                                                                                                                                                                                                                           |
| let-7 | MIMAT0000096 | TGAGGTAGTAAGTTGTATTGTT | (19) | E2F2, MYC, E2F1, NCOA3, TUSC2, HMGA2, ZFP36L1, ZMPSTE24, THBS1, SERP1, SLC20A1, MEIS1, CNOT4, HNRPDL, AMMECR1, CBX5, CHRN1, ACADM, SOCS4                                                                                                                                                                                                                                                                                                                                                                                                                                                                                                                                                                                |
| let-7 | MIMAT0000414 | TGAGGTAGTAGTTTGTACAGTT |      | Unk                                                                                                                                                                                                                                                                                                                                                                                                                                                                                                                                                                                                                                                                                                                     |
| let-7 | MIMAT0000415 | TGAGGTAGTAGTTTGTGCTGTT | (9)  | BMP2K, CSN1, CSN6, CSN8, DAD1, EIF4G2, FANCD2, IL-13, TLR4                                                                                                                                                                                                                                                                                                                                                                                                                                                                                                                                                                                                                                                              |
| ND    | MIMAT0018980 | AGAGGTAGGTGTGGAAGAA    |      | Unk                                                                                                                                                                                                                                                                                                                                                                                                                                                                                                                                                                                                                                                                                                                     |
| ND    | MIMAT0019036 | TGAGGTAGTAGTTTCTT      |      | Unk                                                                                                                                                                                                                                                                                                                                                                                                                                                                                                                                                                                                                                                                                                                     |

Suppl Table 2. OTE filtering analysis for the arrayed shRNA screening data published by Barbie.

Seed heptamers within the miRNA sequences are highlighted in red.

W; KRAS-wild type, M; KRAS-mutant.

| Type  | Seed heptamer | Targets in screening library | Cell lines                                           | miRbase ID   | miRNA sequence                     |
|-------|---------------|------------------------------|------------------------------------------------------|--------------|------------------------------------|
| W & M | TGAGGGC       | 1 VRK2                       | 3 PC3, RPMI-8226, U87                                | MIMAT0005576 | <b>GTGAGGGC</b> ATGCAGGCCTGGATGGGG |
| W     | CAGGTGA       | 1 HGS                        | 1 MDA-MB-453                                         | MIMAT0004602 | <b>ACAGGTG</b> AGGTTCTTGGGAGCC     |
| W     | TGAAGCT       | 1 RPS6KA2                    | 1 LNCAP                                              | MIMAT0004604 | <b>CTGAAGCT</b> CAGAGGGCTCTGAT     |
| W & M | TGCTTGA       | 2 MAP3K12, MYO3B             | 7 A549, LN229, MCF7, MDA-MB-231, NOMO-1, OVCAR8, U87 | MIMAT0018079 | <b>TTGCTTGA</b> ACCCAGGAAGTGGA     |
| W     | TCACATT       | 1 WNK1                       | 1 THP-1                                              | MIMAT0004593 | <b>TCACATT</b> GTGCTACTGTCTGC      |
| W     | TATTGCT       | 1 CC2D1A                     | 1 LNCAP                                              | MIMAT0000429 | <b>TTATTGCT</b> TAAGAATACGCGTAG    |
| W     | AACACTG       | 1 SDHD                       | 1 U87                                                | MIMAT0000432 | <b>TAACTGT</b> TCTGGTAAAGATGG      |
| M     | TGTGTGG       | 1 KIAA1446                   | 1 A549                                               | MIMAT0000251 | <b>GTGTGTGG</b> AAATGCTTCTGC       |
| W     | TTGGCAA       | 1 LIMK2                      | 1 T47D                                               | MIMAT0000259 | <b>TTGGCAA</b> TGGTAGAACTCACACT    |
| W     | AACACTG       | 1 SDHD                       | 1 U87                                                | MIMAT0000682 | <b>TAACTGT</b> TCTGGTAAACGATGT     |
| W & M | AATACTG       | 1 PLCB2                      | 4 HCT-116, LN229, RPMI-8226, TOV21G                  | MIMAT0000318 | <b>TAATACTG</b> CCTGGTAATGATGA     |
| W & M | AATACTG       | 1 PLCB2                      | 4 HCT-116, LN229, RPMI-8226, TOV21G                  | MIMAT0000617 | <b>TAATACTG</b> CCGGGTAATGATGGA    |
| W     | ATTTTCAG      | 1 SMG1                       | 1 THP-1                                              | MIMAT0009197 | <b>GATTTTCAG</b> TGGAGTGAAGTTC     |
| W     | CTGTAGT       | 1 AMHR2                      | 1 LNCAP                                              | MIMAT0004752 | <b>ACTGTAGT</b> ATGGGCACTTCCAG     |
| M     | AACACCA       | 1 THBS1                      | 1 DLD-1                                              | MIMAT0004494 | <b>CAACACCA</b> GTCGATGGGCTGT      |
| M     | CAGCAGG       | 1 TRPV6                      | 1 NOMO-1                                             | MIMAT0000271 | <b>ACAGCAGG</b> CACAGACAGGCAGT     |
| W     | TGTGCTT       | 1 CDK10                      | 1 Fibroblast                                         | MIMAT0000275 | <b>TTGTGCTT</b> GATCTAACCATGT      |
| W     | AAGTCAC       | 1 EEF2K                      | 1 U87                                                | MIMAT0000281 | <b>CAAGTCAC</b> TAGTGGTTCCGTT      |
| W & M | AAATGGT       | 2 NEK10, SCYL3               | 2 786-O, NOMO-1                                      | MIMAT0009198 | <b>AAAATGGT</b> GCCCTAGTGACTACA    |
| W     | TTGTCCT       | 1 CPNE1                      | 1 MDA-MB-453                                         | MIMAT0017950 | <b>ATTGTCCT</b> TGCTGTTTGGAGAT     |
| W     | TCACATT       | 1 WNK1                       | 1 THP-1                                              | MIMAT0000078 | <b>ATCACATT</b> GCCAGGGATTTC       |
| W     | TCACATT       | 1 WNK1                       | 1 THP-1                                              | MIMAT0000418 | <b>ATCACATT</b> GCCAGGGATTACC      |
| W     | TCACATT       | 1 WNK1                       | 1 THP-1                                              | MIMAT0018000 | <b>ATCACATT</b> GCCAGTGATTACCC     |
| W & M | CTGTTCT       | 2 CDC42SE2, NEK3             | 3 Fibroblast, LNCAP, TOV21G                          | MIMAT0004500 | <b>CCTGTTCT</b> CCACTTGGCTC        |
| W     | TCACAGT       | 1 IHPK2                      | 1 PC3                                                | MIMAT0000084 | <b>TCACAGT</b> GGCTAAGTTCCGC       |
| W     | TCACAGT       | 1 IHPK2                      | 1 PC3                                                | MIMAT0000419 | <b>TCACAGT</b> GGCTAAGTTCTGC       |
| W     | TGTATGT       | 1 PCTK1                      | 1 MCF7                                               | MIMAT0004450 | <b>ATGTATGT</b> GTGCATGTGCATG      |

|       |         |   |                  |   |                                                                                  |              |                          |
|-------|---------|---|------------------|---|----------------------------------------------------------------------------------|--------------|--------------------------|
| W     | TTTCAGT | 1 | PRKACA           | 1 | MCF7                                                                             | MIMAT0000088 | CTTTCAGTCGGATGTTTGCAGC   |
| W     | TTTCAGT | 1 | PRKACA           | 1 | MCF7                                                                             | MIMAT0004551 | CTTTCAGTCAGATGTTTGTCTGC  |
| W     | TTTCAGT | 1 | PRKACA           | 1 | MCF7                                                                             | MIMAT0000693 | CTTTCAGTCGGATGTTTACAGC   |
| W     | ACAGCAA | 1 | PPM1F            | 1 | LNCAP                                                                            | MIMAT0014982 | CACAGCAAGTGTAGACAGGCA    |
| W     | CTGGCAA | 1 | INPP4B           | 1 | 786-O                                                                            | MIMAT0014991 | TCTGGCAAGTAAAAACTCTCAT   |
| W     | GAGGAGA | 1 | GNB2L1           | 1 | PC3                                                                              | MIMAT0018194 | TGAGGAGATCGTCGAGGTTGG    |
| W & M | AGGGCTT | 1 | VRK2             | 2 | RPMI-8226, U87                                                                   | MIMAT0015032 | AAGGGCTTCCTCTCTGCAGGAC   |
| W     | GAGGCTT | 1 | STK36            | 1 | LNCAP                                                                            | MIMAT0015070 | AGAGGCTTTGTGCGGATACGGGG  |
| W     | CTCTGGG | 2 | MAP2K6,<br>SYT11 | 2 | LNCAP, PC3                                                                       | MIMAT0000756 | CCTCTGGGCCCTTCTCCAG      |
| W     | CTCTGGG | 2 | MAP2K6,<br>SYT11 | 2 | LNCAP, PC3                                                                       | MIMAT0004693 | TCTCTGGGCCTGTGTCTTAGGC   |
| W     | AATCACT | 1 | PAK2             | 1 | Fibroblast                                                                       | MIMAT0004676 | CAATCACTAACTCCACTGCCAT   |
| M     | AACACCA | 1 | THBS1            | 1 | DLD-1                                                                            | MIMAT0019877 | AAACACCATTTGTCACACTCCAC  |
| W     | CATGTGA | 1 | GUCY2D           | 1 | PC3                                                                              | MIMAT0017984 | GCATGTGATGAAGCAAATCAGT   |
| W     | GGAGGCA | 1 | NEK3             | 2 | Fibroblast, LNCAP                                                                | MIMAT0017989 | AGGAGGCACTTTGAGAAATGGA   |
| W     | TGAAGTG | 1 | PDK2             | 3 | Fibroblast, HMEC-TERT, PC3                                                       | MIMAT0017995 | ATGAAGTGCACTCATGATATGT   |
| M     | CAGCAGG | 1 | TRPV6            | 1 | NOMO-1                                                                           | MIMAT0017999 | TCAGCAGGCAGGCTGGTGCAGC   |
| W     | TGAAGTG | 1 | PDK2             | 3 | Fibroblast, HMEC-TERT, PC3                                                       | MIMAT0018066 | CTGAAGTGATGATTCACATTCAT  |
| W & M | TACTTCT | 2 | CSNK1E,<br>RXRG  | 9 | 786-O, DLD-1, HCT-116, MCF7,<br>MDA-MB-231, NOMO-1,<br>OVCAR8, RPMI-8226, TOV21G | MIMAT0019222 | CTACTTCTACCTGTGTTATCAT   |
| W     | AAGGCAG | 1 | ORK2             | 1 | U87                                                                              | MIMAT0018165 | GAAGGCAGCAGTGCTCCCCTGT   |
| M     | ATGTAAT | 1 | PRKDC            | 4 | A549, DLD-1, NOMO-1,<br>TOV21G                                                   | MIMAT0000735 | TATGTAATATGGTCCACATCTT   |
| W     | TGAGGAA | 1 | MAGI3            | 1 | HMEC-TERT                                                                        | MIMAT0018189 | TTGAGGAAAGATGGTCTTATT    |
| W     | AAGGTCA | 2 | AKAP6, IKBKE     | 2 | 786-O, T47D                                                                      | MIMAT0019359 | AAAGGTCAATTGTAAGGTTAATGC |
| W     | AATGTTG | 2 | DCK, ITSN2       | 4 | 786-O, LN229, MCF7, T47D                                                         | MIMAT0001639 | GAATGTTGCTCGGTGAACCCCT   |
| W & M | CCAGCTC | 1 | RXRG             | 2 | DLD-1, OVCAR8                                                                    | MIMAT0016893 | TCCAGCTCGGTGGCAC         |
| W     | CAGGCAC | 1 | PLAUR            | 1 | T47D                                                                             | MIMAT0016897 | GCAGGCACAGACAGCCCTGGC    |
| W & M | TCAGTGA | 1 | RIPK5            | 2 | HMEC-TERT, MDA-MB-231                                                            | MIMAT0016904 | CTCAGTGACTCATGTGC        |
| W & M | AATACTG | 1 | PLCB2            | 4 | HCT-116, LN229, RPMI-8226,<br>TOV21G                                             | MIMAT0001536 | TAATACTGTCTGGTAAAACCGT   |
| W     | CAGCATT | 1 | PLAUR            | 1 | T47D                                                                             | MIMAT0016862 | GCAGCATTATGTCCC          |
| W     | TCTGGGA | 1 | PSKH1            | 1 | OVCAR8                                                                           | MIMAT0016868 | CTCTGGGAAATGGGACAG       |
| W     | TCCACTT | 2 | EXT2, GSC        | 2 | Fibroblast, LNCAP                                                                | MIMAT0019940 | GTCCACTTCTGCCTGCCCTGCC   |
| W     | TGAATTC | 1 | HGS              | 1 | MDA-MB-453                                                                       | MIMAT0018974 | TTGAATTC TTGGCCTTAAGTGAT |

|       |         |   |              |   |                                  |              |                         |
|-------|---------|---|--------------|---|----------------------------------|--------------|-------------------------|
| W     | GGCAAAC | 1 | LIMK2        | 1 | T47D                             | MIMAT0018997 | TGGCAAACGTGGAAGCCGAGA   |
| W     | TGTGGCT | 1 | CDKL2        | 2 | HMEC-TERT, LNCAP                 | MIMAT0019001 | TTGTGGCTGGTCATGAGGCTAA  |
| W & M | CTTGAAG | 1 | MYO3B        | 5 | A549, LN229, NOMO-1, OVCAR8, U87 | MIMAT0019692 | TCTTGAAGTCAGAACCCGCAA   |
| W     | CTGAGGC | 1 | STK36        | 1 | LNCAP                            | MIMAT0019712 | TCTGAGGCCTGCCTCTCCCCA   |
| M     | TTCTGTT | 1 | THBS1        | 1 | DLD-1                            | MIMAT0019717 | GTTCTGTTAACCCATCCCCTCA  |
| M     | TACACAT | 1 | STK16        | 1 | MDA-MB-231                       | MIMAT0015002 | ATACACATACACGCAACACACAT |
| M     | TACATGT | 1 | PIK4CB       | 1 | A549                             | MIMAT0019741 | ATACATGTCAGATTGTATGCC   |
| W & M | CTGAGTT | 1 | PSKH1        | 4 | DLD-1, NOMO-1, OVCAR8, U87       | MIMAT0019767 | TCTGAGTTCCTGGAGCCTGGTCT |
| M     | GGCTGTT | 1 | CDC42SE2     | 1 | TOV21G                           | MIMAT0019775 | TGGCTGTTGGAGGGGGCAGGC   |
| W & M | TGAGGAG | 2 | GNB2L1, ULK1 | 2 | PC3, RPMI-8226                   | MIMAT0019778 | TTGAGGAGACATGGTGGGGGCC  |
| W     | CAGCCAC | 1 | TK1          | 1 | LN229                            | MIMAT0019782 | CCAGCCACGGACTGAGAGTGCAT |
| W     | TCTCCCA | 1 | ACVR1B       | 1 | LNCAP                            | MIMAT0019820 | TTCTCCCACTACCAGGCTCCCA  |
| W     | TCTGCCA | 1 | MAGI3        | 1 | 786-O                            | MIMAT0019847 | ATCTGCCAGCTTCCACAGTGG   |
| W     | CAGGCAA | 1 | RET          | 1 | T47D                             | MIMAT0019872 | TCAGGCAAAGGGATATTTACAGA |
| W     | TCTCTTT | 2 | PLCG2, SYT4  | 2 | Fibroblast, MCF7                 | MIMAT0019891 | TTCTCTTTCTTTAGCCTTGTGT  |
| W     | GCCAGGC | 1 | RET          | 1 | T47D                             | MIMAT0019896 | AGCCAGGCTCTGAAGGGAAAGT  |
| M     | CAGAGAT | 1 | GCK          | 1 | NOMO-1                           | MIMAT0019900 | CCAGAGATGGTTGCCTTCCTAT  |
| W & M | CAAGGTG | 1 | FN3KRP       | 2 | DLD-1, LN229                     | MIMAT0019908 | ACAAGGTGTGCATGCCTGACC   |
| W     | CAGGAGA | 1 | STK32C       | 2 | 786-O, U87                       | MIMAT0019921 | CCAGGAGATCCAGAGAGAAT    |
| W     | TTCTCTC | 1 | MAP4K2       | 1 | HMEC-TERT                        | MIMAT0019920 | ATTCTCTCTGGATCCCATGGAT  |
| W     | CTGCCAT | 1 | MAGI3        | 1 | HMEC-TERT                        | MIMAT0019923 | TCTGCCATCCTCCCTCCCCTAC  |
| W     | TTGCCAT | 1 | AKAP7        | 1 | LNCAP                            | MIMAT0019933 | CTTGCCATCCTGGTCCACTGCAT |
| W     | ATTCTGT | 1 | GSK3B        | 1 | MDA-MB-453                       | MIMAT0019936 | AATTCTGTAAAGGAAGAAGAGG  |
| W & M | ATGTTGG | 1 | EIF2AK3      | 2 | DLD-1, LN229                     | MIMAT0019943 | AATGTTGGAATCCTCGCTAGAG  |
| W     | GAGGAGA | 1 | GNB2L1       | 1 | PC3                              | MIMAT0019948 | TGAGGAGATGCTGGGACTGA    |
| W     | TGAAAGG | 1 | ITPKA        | 2 | 786-O, U87                       | MIMAT0004763 | TTGAAAGGCTATTTCTTGGTC   |
| M     | TGTACAT | 1 | PIK4CB       | 1 | A549                             | MIMAT0002813 | TTGTACATGGTAGGCTTTCATT  |
| W     | GAAACAT | 1 | IKBKE        | 1 | T47D                             | MIMAT0002816 | TGAAACATACACGGGAAACCTC  |
| M     | TTTCACC | 1 | HSPA5        | 2 | MDA-MB-231, NOMO-1               | MIMAT0020603 | GTTTCACCATGTTGGTCAGGC   |
| M     | TGTCTTT | 1 | PRKDC        | 4 | A549, DLD-1, NOMO-1, TOV21G      | MIMAT0002808 | GTGTCTTTTGCTCTGCAGTCA   |
| W     | TCACAGG | 1 | HGS          | 1 | MDA-MB-453                       | MIMAT0002877 | TTCACAGGGAGGTGTCAT      |
| W     | TCTCCAA | 1 | BMPR2        | 1 | Fibroblast                       | MIMAT0002826 | TTCTCCAAAGAAAGCACTTTCTG |
| W     | GCTTCCT | 1 | CDKL5        | 1 | LNCAP                            | MIMAT0006778 | TGCTTCCTTTCAGAGGGT      |
| W     | TCTGGAG | 1 | NEK3         | 2 | Fibroblast, LNCAP                | MIMAT0002859 | ATCTGGAGGTAAGAAGCACTTT  |
| W     | GCTTCCT | 1 | CDKL5        | 1 | LNCAP                            | MIMAT0002860 | TGCTTCCTTTCAGAGGGT      |



|       |         |   |              |   |                                   |              |          |                 |
|-------|---------|---|--------------|---|-----------------------------------|--------------|----------|-----------------|
| W     | TCTCCAA | 1 | BMP2         | 1 | Fibroblast                        | MIMAT0002828 | TTCTCCAA | AAGGGAGCACTTTC  |
| M     | AGTGCTT | 1 | MAP3K12      | 1 | NOMO-1                            | MIMAT0002830 | AAGTGCTT | CCTTTT          |
| W & M | AAATGGT | 2 | NEK10, SCYL3 | 2 | 786-O, NOMO-1                     | MIMAT0002868 | AAAATGGT | TCCCTTTAGAGTGT  |
| W     | GAGAAAT | 1 | ORK2         | 1 | U87                               | MIMAT0003163 | GGAGAAAT | TATCCTTGGTGTGT  |
| W & M | GTGACAG | 1 | EIF2AK3      | 4 | Fibroblast, MCF7, MDA-MB-231, PC3 | MIMAT0003389 | TGTGACAG | ATTGATAACTGAAA  |
| W     | AACATTC | 1 | LRRK2        | 1 | PC3                               | MIMAT0004954 | AAACATTC | GCGGTGCACTTCTT  |
| W     | CAGCAAA | 1 | AXL          | 1 | MCF7                              | MIMAT0003165 | T        | CAGCAAA         |
| W     | AAAGTAA | 1 | MERTK        | 1 | 786-O                             | MIMAT0004803 | AAAAGTAA | TTGCGAGTTTTACC  |
| W     | AAAGTAA | 1 | MERTK        | 1 | 786-O                             | MIMAT0018928 | AAAAGTAA | TTGTGGATTTTGTCT |
| W     | AAAGTAA | 1 | MERTK        | 1 | 786-O                             | MIMAT0019013 | AAAAGTAA | CTGCGTTTTTGA    |
| W     | AAAGGCA | 1 | CABC1        | 1 | MCF7                              | MIMAT0019079 | AAAAGGCA | TTGTGGTTTTTG    |
| W     | AAAGTAA | 1 | MERTK        | 1 | 786-O                             | MIMAT0004798 | AAAAGTAA | TTGTGGTTTTGGCC  |
| W     | AAAGTAA | 1 | MERTK        | 1 | 786-O                             | MIMAT0004806 | AAAAGTAA | TTGCGTTTTTGGCC  |
| W     | AAAGTAA | 1 | MERTK        | 1 | 786-O                             | MIMAT0004812 | AAAAGTAA | TTGTGGTTTTTGGCC |
| W     | AAAGTAA | 1 | MERTK        | 1 | 786-O                             | MIMAT0005928 | AAAAGTAA | TCGCGTTTTTGTCT  |
| W     | AAAGTAA | 1 | MERTK        | 1 | 786-O                             | MIMAT0005935 | AAAAGTAA | TTGCGGATTTTGGCC |
| W     | AAAGTAA | 1 | MERTK        | 1 | 786-O                             | MIMAT0005875 | AAAAGTAA | TTGCGGTCTTTGGT  |
| W     | TGGCCAA | 1 | GUCY2D       | 1 | PC3                               | MIMAT0014987 | ATGGCCAA | AACTGCAGTTATTTT |
| W     | AAAGTAA | 1 | MERTK        | 1 | 786-O                             | MIMAT0015060 | AAAAGTAA | CTGCGTTTTTGCCT  |
| W     | AAAGTAA | 1 | MERTK        | 1 | 786-O                             | MIMAT0018354 | AAAAGTAA | CTACTGTTTTTGGCC |
| W & M | ACAGGTG | 1 | FRAP1        | 2 | MCF7, TOV21G                      | MIMAT0003215 | AACAGGTG | ACTGGTTAGACAA   |
| W     | AAAGTAA | 1 | MERTK        | 1 | 786-O                             | MIMAT0003223 | TAAAGTAA | ATATGCACCAAAA   |
| W & M | AAAGTTT | 1 | SNF1LK2      | 2 | HMEC-TERT, RPMI-8226              | MIMAT0003225 | CAAAGTTT | AAGATCCTTGAAGT  |
| W & M | GAGTTGG | 1 | PSKH1        | 4 | DLD-1, NOMO-1, OVCAR8, U87        | MIMAT0003236 | TGAGTTGG | CCATCTGAGTGAG   |
| W     | TGAAGTG | 1 | PDK2         | 3 | Fibroblast, HMEC-TERT, PC3        | MIMAT0003238 | CTGAAGTG | ATGTGTA         |
| W & M | AGATGTG | 2 | INSRR, STK33 | 3 | A549, HCT-116, LN229              | MIMAT0004796 | AAGATGTG | GAAAAATTGGAATC  |
| M     | TTCTTGT | 2 | PLCB2, ULK1  | 3 | A549, RPMI-8226, TOV21G           | MIMAT0003243 | CTTCTTGT | GCTCTAGGATTGT   |
| W     | TCATTTG | 1 | RIMS1        | 1 | PC3                               | MIMAT0003244 | TTCATTTG | GTATAA          |
| W     | TGAGAAT | 1 | CSNK1E       | 1 | U87                               | MIMAT0003245 | TTGAGAAT | GATGAATCATTAGG  |
| W     | AAATCCC | 1 | MLKL         | 1 | PC3                               | MIMAT0003273 | TAAATCCC | ATGGTGCTTCTCCT  |
| W     | CAGTCTG | 1 | IHPK2        | 1 | PC3                               | MIMAT0003291 | ACAGTCTG | CTGAGGTTGGAGC   |
| W     | ACAAGGT | 1 | IKBKE        | 1 | T47D                              | MIMAT0004807 | CACAAGGT | ATTGGTATTACCT   |
| W     | TTCTCCC | 1 | TRRAP        | 1 | OVCAR8                            | MIMAT0003298 | GTTCTCCA | AACGTAAGCCCAGC  |
| M     | ACCAGCA | 1 | TRPV6        | 1 | NOMO-1                            | MIMAT0003304 | AACCAGCA | CCCCAACTTTGGAC  |
| W     | TGGCTGC | 1 | PDK2         | 2 | 786-O, LN229                      | MIMAT0003317 | GTGGCTGC | ACTCACTTCTTC    |

|       |         |   |            |   |                                           |              |          |                  |
|-------|---------|---|------------|---|-------------------------------------------|--------------|----------|------------------|
| W     | GGAGGCA | 1 | NEK3       | 2 | Fibroblast, LNCAP                         | MIMAT0003320 | AGGAGGCA | GCGCTCTCAGGAC    |
| W & M | ATGTCTG | 1 | CHEK1      | 4 | DLD-1, LN229, OVCAR8,<br>TOV21G           | MIMAT0004814 | TATGTCTG | CTGACCATCACCTT   |
| W & M | TGTTGCC | 1 | STK17A     | 2 | NOMO-1, T47D                              | MIMAT0004946 | CTGTTGCC | ACTAACCTCAACCT   |
| M     | CAGCAGG | 1 | TRPV6      | 1 | NOMO-1                                    | MIMAT0010364 | GCAGCAGG | GTGAAACTGACACA   |
| W     | ACTGACA | 1 | WNK3       | 1 | LNCAP                                     | MIMAT0004917 | GACTGACA | CCTCTTTGGGTGAA   |
| W & M | CTTTGGT | 2 | CDK8, NEK7 | 2 | A549, Fibroblast                          | MIMAT0000441 | TCTTTGGT | TATCTAGCTGTATGA  |
| M     | CAGCAGA | 1 | PACSIN1    | 1 | RPMI-8226                                 | MIMAT0004972 | GCAGCAGA | GAAATAGGACTACGTC |
| W & M | CTGCTGA | 1 | BTK        | 5 | LN229, NOMO-1, OVCAR8,<br>RPMI-8226, T47D | MIMAT0004509 | ACTGCTGA | GCTAGCACTTCCCG   |

---

Suppl Table 3. List of cell lines used in the Cheung and Barbie RNAi screens.  
W; KRAS-wild type, M; KRAS-mutant, U; KRAS-status unknown.

| Number | Publication   Cell line | Tumor type           | KRAS Status |
|--------|-------------------------|----------------------|-------------|
| 1      | Cheung   786-O          | Renal Cell Carcinoma | W           |
| 2      | Cheung   A-204          | Rhabdomyosarcoma     | W           |
| 3      | Cheung   A2058          | Melanoma             | W           |
| 4      | Cheung   A2780          | Ovarian              | W           |
| 5      | Cheung   BxPC-3         | Pancreas             | W           |
| 6      | Cheung   C2BBE1         | Colon                | W           |
| 7      | Cheung   Caov-3         | Ovarian              | W           |
| 8      | Cheung   Caov-4         | Ovarian              | W           |
| 9      | Cheung   COLO 205       | Colon                | W           |
| 10     | Cheung   COLO 741       | Melanoma             | W           |
| 11     | Cheung   COV362         | Ovarian              | W           |
| 12     | Cheung   COV504         | Ovarian              | W           |
| 13     | Cheung   EFO-21         | Ovarian              | W           |
| 14     | Cheung   EFO-27         | Ovarian              | W           |
| 15     | Cheung   HCC2814        | NSCLC                | W           |
| 16     | Cheung   HCC364         | NSCLC                | W           |
| 17     | Cheung   HCC70          | Breast               | W           |
| 18     | Cheung   HCC827         | NSCLC                | W           |
| 19     | Cheung   HL-60          | Leukemia             | W           |
| 20     | Cheung   HLF            | Liver                | W           |
| 21     | Cheung   Hs 944.T       | Melanoma             | W           |
| 22     | Cheung   HT-29          | Colon                | W           |
| 23     | Cheung   HT55           | Colon                | W           |
| 24     | Cheung   HuG1-N         | Gastric              | W           |
| 25     | Cheung   HuTu 80        | Colon                | W           |
| 26     | Cheung   IGR-39         | Melanoma             | W           |
| 27     | Cheung   IGROV1         | Ovarian              | W           |
| 28     | Cheung   IOMM-LEE       | Meningioma           | W           |
| 29     | Cheung   KM12           | Colon                | W           |
| 30     | Cheung   KMS-12-BM      | Multiple Myeloma     | W           |
| 31     | Cheung   KURAMOCHI      | Ovarian              | W           |

|    |                      |              |   |
|----|----------------------|--------------|---|
| 32 | Cheung   KYSE-150    | Esophageal   | W |
| 33 | Cheung   KYSE-30     | Esophageal   | W |
| 34 | Cheung   KYSE-450    | Esophageal   | W |
| 35 | Cheung   KYSE-510    | Esophageal   | W |
| 36 | Cheung   LN-229      | GBM          | W |
| 37 | Cheung   LS411N      | Colon        | W |
| 38 | Cheung   MDA-MB-453  | Breast       | W |
| 39 | Cheung   NCI-H1650   | NSCLC        | W |
| 40 | Cheung   NCI-H196    | SCLC         | W |
| 41 | Cheung   NCI-H1975   | NSCLC        | W |
| 42 | Cheung   NCI-H2171   | SCLC         | W |
| 43 | Cheung   NCI-H508    | Colon        | W |
| 44 | Cheung   NCI-H661    | NSCLC        | W |
| 45 | Cheung   NCI-H82     | SCLC         | W |
| 46 | Cheung   NIH:OVCAR-3 | Ovarian      | W |
| 47 | Cheung   OE33        | Esophageal   | W |
| 48 | Cheung   OV-90       | Ovarian      | W |
| 49 | Cheung   OVCAR-4     | Ovarian      | W |
| 50 | Cheung   OVCAR-8     | Ovarian      | W |
| 51 | Cheung   OWISE       | Ovarian      | W |
| 52 | Cheung   OVMANA      | Ovarian      | W |
| 53 | Cheung   RKO         | Colon        | W |
| 54 | Cheung   RMG-I       | Ovarian      | W |
| 55 | Cheung   RT-112      | Bladder      | W |
| 56 | Cheung   SJSA-1      | Osteosarcoma | W |
| 57 | Cheung   SNU-C1      | Colon        | W |
| 58 | Cheung   SW48        | Colon        | W |
| 59 | Cheung   T.T         | Esophageal   | W |
| 60 | Cheung   TE-15       | Esophageal   | W |
| 61 | Cheung   TE-9        | Esophageal   | W |
| 62 | Cheung   TYK-nu      | Ovarian      | W |
| 63 | Cheung   U-251 MG    | GBM          | W |
| 64 | Cheung   A549        | NSCLC        | M |
| 65 | Cheung   AGS         | Gastric      | M |
| 66 | Cheung   AsPC-1      | Pancreas     | M |
| 67 | Cheung   CFPAC-1     | Pancreas     | M |

|     |                     |                      |   |
|-----|---------------------|----------------------|---|
| 68  | Cheung   DLD-1      | Colon                | M |
| 69  | Cheung   GP2d       | Colon                | M |
| 70  | Cheung   HEC-1-A    | Endometrial          | M |
| 71  | Cheung   Hey-A8     | Ovarian              | M |
| 72  | Cheung   HPAC       | Pancreas             | M |
| 73  | Cheung   KP-1NL     | Pancreas             | M |
| 74  | Cheung   KP4        | Pancreas             | M |
| 75  | Cheung   L3.3       | Pancreas             | M |
| 76  | Cheung   LoVo       | Colon                | M |
| 77  | Cheung   LS513      | Colon                | M |
| 78  | Cheung   MIA PaCa-2 | Pancreas             | M |
| 79  | Cheung   NCI-H2122  | NSCLC                | M |
| 80  | Cheung   Panc 03.27 | Pancreas             | M |
| 81  | Cheung   Panc 08.13 | Pancreas             | M |
| 82  | Cheung   Panc 10.05 | Pancreas             | M |
| 83  | Cheung   QGP-1      | Pancreas             | M |
| 84  | Cheung   RKN        | Ovarian              | M |
| 85  | Cheung   SK-CO-1    | Colon                | M |
| 86  | Cheung   SNU-C2A    | Colon                | M |
| 87  | Cheung   SU.86.86   | Pancreas             | M |
| 88  | Cheung   SW480      | Colon                | M |
| 89  | Cheung   TOV-21G    | Ovarian              | M |
| 90  | Cheung   CH-157MN   | Meningioma           | U |
| 91  | Cheung   COLO-704   | Ovarian              | U |
| 92  | Cheung   COV434     | Ovarian              | U |
| 93  | Cheung   F5         | Meningioma           | U |
| 94  | Cheung   JH-ESOAD1  | Esophageal           | U |
| 95  | Cheung   JHOC-5     | Ovarian              | U |
| 96  | Cheung   LN-215     | GBM                  | U |
| 97  | Cheung   LN-319     | GBM                  | U |
| 98  | Cheung   LN-464     | GBM                  | U |
| 99  | Cheung   SF767      | GBM                  | U |
| 100 | Cheung   SLR21      | Renal Cell Carcinoma | U |
| 101 | Cheung   SNU-840    | Ovarian              | U |
| 102 | Cheung   TOV-112D   | Ovarian              | U |
| 103 | Barbie   786-O      | Renal Cell Carcinoma | W |

|     |                      |            |   |
|-----|----------------------|------------|---|
| 104 | Barbie   Fibroblasts | Skin       | W |
| 105 | Barbie   HMEC-TERT   | Epithelium | W |
| 106 | Barbie   LN-229      | GBM        | W |
| 107 | Barbie   LNCAP       | Prostate   | W |
| 108 | Barbie   MCF7        | Breast     | W |
| 109 | Barbie   MDA-MB-453  | Breast     | W |
| 110 | Barbie   OVCAR-8     | Ovarian    | W |
| 111 | Barbie   PC3         | Prostate   | W |
| 112 | Barbie   T47D        | Breast     | W |
| 113 | Barbie   THP-1       | Leukemia   | W |
| 114 | Barbie   U87         | GBM        | W |
| 115 | Barbie   A549        | NSCLC      | M |
| 116 | Barbie   DLD-1       | Colon      | M |
| 117 | Barbie   HCT-116     | Colon      | M |
| 118 | Barbie   MDA-MB-231  | Breast     | M |
| 119 | Barbie   NOMO-1      | Leukemia   | M |
| 120 | Barbie   RPMI-8226   | Myeloma    | M |
| 121 | Barbie   TOV-21G     | Ovarian    | M |

---

Suppl Table 4. BDA workflow and gene nomination in the 102 cell lines.

ctrl; control,  $\mu$ ; mean,  $\sigma$ ; standard deviation, HC\_OTE; High Confidence Off-Target Effects, LC\_OTE; Low Confidence Off-Target Effects, FC; Fold Change.

| Cell line      | Active duplex identification          | Active gene identification         |                 | OTE filtering |         |         | Re-scoring        | Nominated hits by class |       |
|----------------|---------------------------------------|------------------------------------|-----------------|---------------|---------|---------|-------------------|-------------------------|-------|
|                | FC<br>< $\mu_{ctrl} - 2\sigma_{ctrl}$ | H score $\geq 60$   p-value < 0.05 |                 | HC_OTEs       | LC_OTEs | No OTEs | H score $\geq 60$ |                         |       |
|                | active duplexes                       | active genes                       | active duplexes |               |         |         | Nominated hits    |                         |       |
| KRAS-wild type | 786-O                                 | 5,539                              | 181             | 570           | 22      | 172     | 376               | 162                     | 1,869 |
|                | A-204                                 | 3,473                              | 40              | 118           | 9       | 69      | 40                | 33                      |       |
|                | A2058                                 | 7,811                              | 405             | 1,288         | 47      | 407     | 834               | 368                     |       |
|                | A2780                                 | 3,361                              | 45              | 137           | 10      | 74      | 53                | 38                      |       |
|                | BxPC-3                                | 1,697                              | 19              | 54            | 6       | 27      | 21                | 13                      |       |
|                | C2BBE1                                | 2,352                              | 32              | 95            | 5       | 52      | 38                | 30                      |       |
|                | Caov-3                                | 5,020                              | 112             | 337           | 18      | 148     | 171               | 98                      |       |
|                | Caov-4                                | 5,586                              | 154             | 471           | 20      | 156     | 295               | 139                     |       |
|                | COLO 205                              | 4,514                              | 117             | 364           | 16      | 158     | 190               | 103                     |       |
|                | COLO 741                              | 1,476                              | 10              | 27            | 2       | 14      | 11                | 8                       |       |
|                | COV362                                | 5,123                              | 191             | 610           | 35      | 181     | 394               | 171                     |       |
|                | COV504                                | 3,809                              | 66              | 198           | 16      | 113     | 69                | 52                      |       |
|                | EFO-21                                | 2,775                              | 94              | 289           | 19      | 127     | 143               | 80                      |       |
|                | EFO-27                                | 2,868                              | 36              | 103           | 5       | 61      | 37                | 33                      |       |
|                | HCC2814                               | 4,673                              | 150             | 472           | 22      | 148     | 302               | 138                     |       |
|                | HCC364                                | 5,041                              | 102             | 307           | 22      | 127     | 158               | 85                      |       |
|                | HCC70                                 | 6,069                              | 245             | 774           | 18      | 245     | 511               | 230                     |       |
|                | HCC827                                | 3,945                              | 90              | 270           | 14      | 122     | 134               | 76                      |       |
|                | HL-60                                 | 3,395                              | 31              | 90            | 12      | 50      | 28                | 23                      |       |
|                | HLF                                   | 3,644                              | 47              | 142           | 10      | 80      | 52                | 37                      |       |
|                | Hs 944.T                              | 8,074                              | 413             | 1,281         | 41      | 417     | 823               | 381                     |       |
|                | HT-29                                 | 5,926                              | 278             | 897           | 24      | 259     | 614               | 264                     |       |
|                | HT55                                  | 8,146                              | 474             | 1,514         | 50      | 392     | 1,072             | 437                     |       |
|                | HuG1-N                                | 988                                | 7               | 19            | 2       | 8       | 9                 | 5                       |       |
|                | HuTu 80                               | 4,802                              | 102             | 327           | 24      | 135     | 168               | 82                      |       |

|             |       |     |       |    |     |     |     |
|-------------|-------|-----|-------|----|-----|-----|-----|
| IGR-39      | 5,504 | 154 | 460   | 21 | 189 | 250 | 136 |
| IGROV1      | 2,507 | 49  | 156   | 12 | 84  | 60  | 42  |
| IOMM-LEE    | 2,708 | 27  | 83    | 5  | 45  | 33  | 23  |
| KM12        | 4,392 | 115 | 357   | 17 | 145 | 195 | 103 |
| KMS-12-BM   | 2,218 | 22  | 79    | 6  | 42  | 31  | 20  |
| KURAMOCHI   | 6,869 | 340 | 1,111 | 31 | 330 | 750 | 320 |
| KYSE-150    | 4,592 | 85  | 252   | 14 | 127 | 111 | 73  |
| KYSE-30     | 5,809 | 220 | 693   | 26 | 190 | 477 | 202 |
| KYSE-450    | 4,448 | 99  | 300   | 20 | 143 | 137 | 82  |
| KYSE-510    | 4,600 | 112 | 348   | 20 | 148 | 180 | 98  |
| LN-229      | 3,651 | 57  | 171   | 10 | 93  | 68  | 48  |
| LS411N      | 8,464 | 462 | 1,454 | 37 | 441 | 976 | 438 |
| MDA-MB-453  | 7,349 | 376 | 1,197 | 23 | 341 | 833 | 360 |
| NCI-H1650   | 4,953 | 159 | 504   | 24 | 175 | 305 | 139 |
| NCI-H196    | 1,934 | 16  | 46    | 2  | 29  | 15  | 15  |
| NCI-H1975   | 3,067 | 29  | 82    | 6  | 43  | 33  | 24  |
| NCI-H2171   | 3,244 | 36  | 109   | 9  | 66  | 34  | 27  |
| NCI-H508    | 3,192 | 54  | 163   | 9  | 87  | 67  | 48  |
| NCI-H661    | 2,674 | 55  | 173   | 12 | 108 | 53  | 45  |
| NCI-H82     | 3,108 | 52  | 152   | 15 | 84  | 53  | 39  |
| NIH-OVCAR-3 | 3,931 | 90  | 273   | 16 | 124 | 133 | 75  |
| OE33        | 3,811 | 58  | 178   | 9  | 108 | 61  | 51  |
| OV-90       | 973   | 3   | 8     | 0  | 3   | 5   | 3   |
| OVCAR-4     | 4,690 | 130 | 408   | 14 | 151 | 243 | 121 |
| OVCAR-8     | 7,138 | 294 | 925   | 24 | 292 | 609 | 274 |
| OVISE       | 4,540 | 190 | 626   | 20 | 191 | 415 | 174 |
| OVMANA      | 2,424 | 16  | 46    | 3  | 22  | 21  | 13  |
| RKO         | 6,009 | 310 | 995   | 32 | 282 | 681 | 286 |
| RMG-I       | 5,192 | 144 | 436   | 20 | 176 | 240 | 128 |
| RT-112      | 4,084 | 98  | 297   | 14 | 140 | 143 | 87  |
| SJSA-1      | 2,479 | 21  | 62    | 7  | 28  | 27  | 15  |
| SNU-C1      | 2,168 | 31  | 100   | 6  | 57  | 37  | 25  |
| SW48        | 2,822 | 32  | 92    | 11 | 48  | 33  | 22  |
| T.T         | 3,154 | 42  | 126   | 14 | 74  | 38  | 33  |
| TE-15       | 3,999 | 85  | 257   | 20 | 124 | 113 | 72  |
| TE-9        | 4,036 | 70  | 217   | 14 | 118 | 85  | 59  |



|              |            |       |     |     |     |     |     |     |       |
|--------------|------------|-------|-----|-----|-----|-----|-----|-----|-------|
|              | TYK-nu     | 3,459 | 63  | 193 | 10  | 108 | 75  | 55  |       |
|              | U-251 MG   | 2,983 | 63  | 190 | 13  | 105 | 72  | 53  |       |
| KRAS-mutant  | A549       | 4,291 | 87  | 262 | 12  | 143 | 107 | 78  | 1,026 |
|              | AGS        | 5,981 | 272 | 876 | 36  | 274 | 566 | 246 |       |
|              | AsPC-1     | 1,477 | 9   | 28  | 1   | 13  | 14  | 9   |       |
|              | CFPAC-1    | 3,521 | 69  | 210 | 15  | 98  | 97  | 60  |       |
|              | DLD-1      | 4,488 | 114 | 351 | 23  | 133 | 195 | 95  |       |
|              | GP2d       | 5,296 | 204 | 675 | 21  | 200 | 454 | 192 |       |
|              | HEC-1-A    | 4,041 | 71  | 219 | 13  | 115 | 91  | 59  |       |
|              | Hey-A8     | 3,209 | 67  | 206 | 22  | 99  | 85  | 49  |       |
|              | HPAC       | 3,341 | 65  | 205 | 14  | 112 | 79  | 61  |       |
|              | KP-1NL     | 7,443 | 311 | 974 | 22  | 258 | 694 | 297 |       |
|              | KP4        | 4,299 | 84  | 260 | 14  | 140 | 106 | 73  |       |
|              | L3.3       | 6,747 | 280 | 884 | 37  | 271 | 576 | 257 |       |
|              | LoVo       | 4,462 | 95  | 297 | 16  | 137 | 144 | 85  |       |
|              | LS513      | 2,802 | 36  | 107 | 7   | 65  | 35  | 30  |       |
|              | MIA PaCa-2 | 2,194 | 20  | 63  | 6   | 39  | 18  | 16  |       |
|              | NCI-H2122  | 3,555 | 71  | 217 | 18  | 101 | 98  | 56  |       |
|              | Panc 03.27 | 5,478 | 194 | 600 | 16  | 191 | 393 | 184 |       |
|              | Panc 08.13 | 2,547 | 60  | 184 | 11  | 93  | 80  | 51  |       |
|              | Panc 10.05 | 1,434 | 9   | 32  | 3   | 19  | 10  | 6   |       |
|              | QGP-1      | 5,423 | 124 | 383 | 10  | 165 | 208 | 122 |       |
| RKN          | 4,837      | 143   | 445 | 17  | 188 | 240 | 128 |     |       |
| SK-CO-1      | 4,334      | 175   | 560 | 13  | 160 | 387 | 168 |     |       |
| SNU-C2A      | 1,127      | 4     | 16  | 0   | 10  | 6   | 4   |     |       |
| SU.86.86     | 3,118      | 83    | 254 | 12  | 135 | 107 | 75  |     |       |
| SW480        | 3,731      | 57    | 170 | 8   | 106 | 56  | 54  |     |       |
| TOV-21G      | 6,148      | 265   | 829 | 24  | 237 | 568 | 247 |     |       |
| KRAS-Unknown | CH-157MN   | 6,366 | 240 | 752 | 15  | 232 | 505 | 227 | 843   |
|              | COLO-704   | 2,585 | 57  | 184 | 12  | 93  | 79  | 49  |       |
|              | COV434     | 4,683 | 101 | 320 | 21  | 139 | 160 | 85  |       |
|              | F5         | 1,334 | 3   | 7   | 1   | 3   | 3   | 2   |       |
|              | JH-ESOAD1  | 5,967 | 221 | 703 | 15  | 204 | 484 | 207 |       |
|              | JHOC-5     | 4,655 | 152 | 489 | 18  | 177 | 294 | 142 |       |
|              | LN-215     | 6,773 | 235 | 736 | 30  | 205 | 501 | 214 |       |

|          |       |     |       |    |     |     |     |
|----------|-------|-----|-------|----|-----|-----|-----|
| LN-319   | 4,145 | 101 | 313   | 23 | 134 | 156 | 87  |
| LN-464   | 4,272 | 107 | 334   | 16 | 154 | 164 | 94  |
| SF767    | 1,658 | 15  | 40    | 3  | 19  | 18  | 13  |
| SLR21    | 5,050 | 129 | 389   | 16 | 154 | 219 | 117 |
| SNU-840  | 8,019 | 443 | 1,405 | 53 | 380 | 972 | 408 |
| TOV-112D | 3,423 | 58  | 177   | 15 | 107 | 55  | 46  |

---

Suppl Table 5. Comparative analysis of hits identified by the BDA methods with those reported by Cheung.

| Tumor type                 |     | Genes nominated in common                                                                                                                                                                                                                                                                                                                                                                                                                                                                                                                                                                                                                                                                                                                                                                                       | Genes nominated by the BDA method only | Genes nominated by Cheung only |
|----------------------------|-----|-----------------------------------------------------------------------------------------------------------------------------------------------------------------------------------------------------------------------------------------------------------------------------------------------------------------------------------------------------------------------------------------------------------------------------------------------------------------------------------------------------------------------------------------------------------------------------------------------------------------------------------------------------------------------------------------------------------------------------------------------------------------------------------------------------------------|----------------------------------------|--------------------------------|
| Ovarian<br>(25 cell lines) | 109 | ABCC13, ADRA1A, AFF4, ALDH9A1, ALKBH5, AOX1, ARCN1, ATXN10, BMPR1A, BRPF3, CD80, CDK2, CHD1, CHN2, CIRH1A, COMT, COPS2, CTNBL1, CWC22, DDB1, DDX17, DLG2, DNAJC10, DOPEY1, DSCR6, EFTUD2, EGLN3, EIF2B5, EIF2S2, EIF3F, F11R, GBA2, GFRA1, HELQ, HNRNPU, HPS3, HSD17B12, HSD3B1, HTR2B, HYAL2, IARS2, IL13RA2, ISL1, KHDRBS1, KIF5A, KTN1, LAYN, LILRA2, LRRC59, LSM6, LSM7, LY96, MBOAT2, MCM6, MDM4, MOGAT1, NAA10, NAPA, NPC1, NUDT5, NUMB, OIP5, OR14A16, OR2J2, PCDHGA8, PDCD4, PHF5A, PNPT1, POLDIP3, POLR1B, POLR2A, PRKX, PRPF3, PSMA2, PSMC2, PSMD11, PSMD3, PTEN, PTPRB, RNF141, RPS15, RPS17, RRM1, SDHAP1, SERPINB11, SF3A1, SF3A2, SF3A3, SLC22A3, SNRNP40, SNRPD1, SNRPE, TACC3, TAF2, TAF7L, TAS2R7, TCEB1, TFEB, TOPBP1, TXNDC5, USP1, USP5, USP9X, USPL1, VCP, XPNPEP3, ZC3H18, ZNF155, ZNF382 | 997                                    | 473                            |
| GBM<br>(6 cell lines)      | 30  | ACOX3, ADAMTS12, APBB1, ARHGEF7, CCL28, CHRNA5, CLEC3B, DVL2, EFEMP1, FRMD1, GAN, ITGA2, LOC389906, LY96, MAP3K12, MB, NACA, NUPL1, OCM2, PRPF19, PSMA1, PSMA3, PSMD1, RPP38, RPSA, SLC5A8, SNRPC, SOX10, TCEB2, USP28                                                                                                                                                                                                                                                                                                                                                                                                                                                                                                                                                                                          | 316                                    | 554                            |

|                                          |     |                                                                                                                                                                                                                                                                                                                                                                                                                                                                                                                                                                                                                                                                                                                                                                                                                                                                                                                                                                                                                                                                                                                                                                                                                                                                                                                                                                                                                                                                                                                                                                                                                                                                                                                                                                                                                                                                                                                                                                                                                                                                                                                                                        |      |     |
|------------------------------------------|-----|--------------------------------------------------------------------------------------------------------------------------------------------------------------------------------------------------------------------------------------------------------------------------------------------------------------------------------------------------------------------------------------------------------------------------------------------------------------------------------------------------------------------------------------------------------------------------------------------------------------------------------------------------------------------------------------------------------------------------------------------------------------------------------------------------------------------------------------------------------------------------------------------------------------------------------------------------------------------------------------------------------------------------------------------------------------------------------------------------------------------------------------------------------------------------------------------------------------------------------------------------------------------------------------------------------------------------------------------------------------------------------------------------------------------------------------------------------------------------------------------------------------------------------------------------------------------------------------------------------------------------------------------------------------------------------------------------------------------------------------------------------------------------------------------------------------------------------------------------------------------------------------------------------------------------------------------------------------------------------------------------------------------------------------------------------------------------------------------------------------------------------------------------------|------|-----|
| Colon<br>(18 cell lines)                 | 145 | <p> ABC B7, ACACA, ACLY, ACP6, ADSL, AIRE, AK3, ARFIP2, AZIN1, BCL2L1, BCLAF1, BHMT2, BOP1, BRAF, CACNA2D4, CDK6, CHD4, CHRNA4, CLCA4, COL16A1, COPB2, COX11, CPSF3, DEK, DHX9, DLC1, DNAJC7, DUSP6, EBNA1BP2, EEF2, EIF2B3, EIF3F, EIF3FP3, EIF3G, EIF3I, EIF4A1, EIF5A, EIF5B, ENPP1, ENPP5, ERCC6, ESPL1, EXOSC10, FDPS, FERMT1, GALNT9, GATA6, GFRA1, GLS, GNG8, GOSR1, GYS2, HNRNPA1, HNRNPM, HSPA8, IGF1R, IQGAP1, ITPKB, KDM2A, KDM6A, KHSRP, KIF11, KRAS, LYRM2, MAGOH, MAX, MED27, MKI67IP, MT1F, MTHFD1, NCBP2, NDUFS8, NPM1, NUP93, NXT2, PAF1, PAFAH1B1, PAGE5, PAPD5, PAQR5, PCBP1, PDCD6, PDK4, PFAS, PFN4, PLA2R1, PLAGL2, POLG2, PPIE, PRPF38B, PSMB6, PSMC4, PSMD2, PUF60, RAD23B, RBM14, RBM47, RFC1, RPA3, RPL31, RPL37, RPS10, RPS15A, RPS19, RPS6, RPS8, RUVBL1, SAFB, SCD, SCN2A, SDHA, SF3B4, SIP1, SMAD4, SMC2, SRSF1, SRSF2, SRSF3, SSRP1, STK38, STX6, TAF4B, TAS2R9, TBX5, TCERG1, TDO2, TDRD3, TINAGL1, TMOD3, TMPRSS9, TSSC1, TUBG1, UBE4A, UCP2, UTY, VPS13B, WARS, WBP11, WNK1, XRCC6, YAP1, YKT6, ZFX, ZNF138, ZNF781<br/> ALAS1, BOP1, CCL28, CD151, CFL1, CYB5R4, CYP11A1, DDX19B, DES, DOT1L, DPYSL2, EGLN3, EIF6, GIPC1, GPR32, GTF2A1L, HCFC2, HNMT, IGF2BP1, JUB, KHSRP, LOC401361, MAP6, MB, MTSS1, MYO18A, NPTN, PFKFB1, PFKM, PFN4, PIK3AP1, PMPCB, POLR2D, PPP1R14B, PSMC4, PTS, RPP38, RUVBL1, SEC14L3, SLC25A23, SRPK3, SSX1, USP28, VPS28, VPS72, ZBTB48, ZC3H13, ZNF22<br/> ACSL3, AKR1C4, ARHGAP31, ASGR2, ATP6V1B2, BCLAF1, BIRC6, C7orf16, CAP1, COPE, DUSP28, EFNA5, EIF4A3, EIF5A, EPRS, ERCC1, FAM188A, FLT3, GPATCH1, GTF3C4, GULP1, HKDC1, ICK, IL15, IRAK3, JUND, KCNJ5, KRAS, KRT17, LIPG, LOC388573, MCM7, MED14, MS4A4A, NPTN, NPTXR, NUPL1, NUTF2, PI4KAP2, PMF1, PPP1R12A, PRPF38B, PSMA2, RASSF7, RGS2, RHOBTB3, RIPK3, RND2, SMARCD2, STK32B, STX4, TGFBR2, TRAFD1, TRIM69, UMODL1, WNK1, ZIC1<br/> ADAMTS3, ATP2A2, ATP6V1B2, BRPF3, C14orf166, CDK6, DDX5, FCRL5, FGFR3, GRIN1, HAUS1, IQGAP3, KCNK5, KIAA0415, LILRA2, MPL, MRPL37, NKX2-1, NUDT10, PDE6D, PMPCB, PRKAA1, PSMA1, PTPRC, PVRL3, QRSL1, RPS12, RRM1, SCN11A, SF3A3, SNRPC, SPTAN1, STK35, SYT4, TTK, VDAC1, ZC3H13 </p> | 1006 | 422 |
| Esophageal<br>Squamous<br>(7 cell lines) | 48  | <p> MTSS1, MYO18A, NPTN, PFKFB1, PFKM, PFN4, PIK3AP1, PMPCB, POLR2D, PPP1R14B, PSMC4, PTS, RPP38, RUVBL1, SEC14L3, SLC25A23, SRPK3, SSX1, USP28, VPS28, VPS72, ZBTB48, ZC3H13, ZNF22<br/> ACSL3, AKR1C4, ARHGAP31, ASGR2, ATP6V1B2, BCLAF1, BIRC6, C7orf16, CAP1, COPE, DUSP28, EFNA5, EIF4A3, EIF5A, EPRS, ERCC1, FAM188A, FLT3, GPATCH1, GTF3C4, GULP1, HKDC1, ICK, IL15, IRAK3, JUND, KCNJ5, KRAS, KRT17, LIPG, LOC388573, MCM7, MED14, MS4A4A, NPTN, NPTXR, NUPL1, NUTF2, PI4KAP2, PMF1, PPP1R12A, PRPF38B, PSMA2, RASSF7, RGS2, RHOBTB3, RIPK3, RND2, SMARCD2, STK32B, STX4, TGFBR2, TRAFD1, TRIM69, UMODL1, WNK1, ZIC1<br/> ADAMTS3, ATP2A2, ATP6V1B2, BRPF3, C14orf166, CDK6, DDX5, FCRL5, FGFR3, GRIN1, HAUS1, IQGAP3, KCNK5, KIAA0415, LILRA2, MPL, MRPL37, NKX2-1, NUDT10, PDE6D, PMPCB, PRKAA1, PSMA1, PTPRC, PVRL3, QRSL1, RPS12, RRM1, SCN11A, SF3A3, SNRPC, SPTAN1, STK35, SYT4, TTK, VDAC1, ZC3H13 </p>                                                                                                                                                                                                                                                                                                                                                                                                                                                                                                                                                                                                                                                                                                                                                                                                                                                                                                                                                                                                                                                                                                                                                                                                                                 | 329  | 530 |
| Pancreas<br>(13 cell lines)              | 57  | <p> IL15, IRAK3, JUND, KCNJ5, KRAS, KRT17, LIPG, LOC388573, MCM7, MED14, MS4A4A, NPTN, NPTXR, NUPL1, NUTF2, PI4KAP2, PMF1, PPP1R12A, PRPF38B, PSMA2, RASSF7, RGS2, RHOBTB3, RIPK3, RND2, SMARCD2, STK32B, STX4, TGFBR2, TRAFD1, TRIM69, UMODL1, WNK1, ZIC1<br/> ADAMTS3, ATP2A2, ATP6V1B2, BRPF3, C14orf166, CDK6, DDX5, FCRL5, FGFR3, GRIN1, HAUS1, IQGAP3, KCNK5, KIAA0415, LILRA2, MPL, MRPL37, NKX2-1, NUDT10, PDE6D, PMPCB, PRKAA1, PSMA1, PTPRC, PVRL3, QRSL1, RPS12, RRM1, SCN11A, SF3A3, SNRPC, SPTAN1, STK35, SYT4, TTK, VDAC1, ZC3H13 </p>                                                                                                                                                                                                                                                                                                                                                                                                                                                                                                                                                                                                                                                                                                                                                                                                                                                                                                                                                                                                                                                                                                                                                                                                                                                                                                                                                                                                                                                                                                                                                                                                   | 601  | 531 |
| NSCLC<br>(8 cell lines)                  | 37  | <p> ADAMTS3, ATP2A2, ATP6V1B2, BRPF3, C14orf166, CDK6, DDX5, FCRL5, FGFR3, GRIN1, HAUS1, IQGAP3, KCNK5, KIAA0415, LILRA2, MPL, MRPL37, NKX2-1, NUDT10, PDE6D, PMPCB, PRKAA1, PSMA1, PTPRC, PVRL3, QRSL1, RPS12, RRM1, SCN11A, SF3A3, SNRPC, SPTAN1, STK35, SYT4, TTK, VDAC1, ZC3H13 </p>                                                                                                                                                                                                                                                                                                                                                                                                                                                                                                                                                                                                                                                                                                                                                                                                                                                                                                                                                                                                                                                                                                                                                                                                                                                                                                                                                                                                                                                                                                                                                                                                                                                                                                                                                                                                                                                               | 354  | 557 |
